# Supplementary material
Source: Springer Nature journal article supplement (https://www.springermedizin.de/resource/supplementary/13052_2009_63_MOESM2_ESM.pdf/9671308)
Supplement: MOESM2 [file 9671308]

# Suggested therapy for idiopathic IS

*Piridoxine* 300 mg/day X 3 days

*Vigabatrin* 100 mg/kg/day

No results. After 15 days, add  
*Topiramate*

0,5-1 mg/kg/day  $\xrightarrow{1 \text{ month}}$  5 mg/kg/day

No results  
*ACTH* 1-2 U/kg/day  
for 10-20 days
